# Supplementary material
Source: ML conference proceedings conference paper supplement (https://openreview.net/forum?id=8FbuHeVU7D)
Supplement: supplementary_material [file attachment]

592 **Appendix A Definitions, proofs, and related work**

593 Here, we provide missing definitions of the KLD and the  $\beta$ -divergence.

594 **Definition 2** (Kullback-Leibler divergence [53]). *The KLD between probability densities  $g(\cdot)$  and*  
 595  *$f(\cdot)$  is given by*

$$\text{KLD}(g||f) = \int g(x) \log \frac{g(x)}{f(x)} dx.$$

596 **Definition 3** ( $\beta$ -divergence [9, 63]). *The  $\beta$ -divergence is defined as*

$$D_B^{(\beta)}(g||f) = \frac{1}{\beta(\beta-1)} \int g(x)^\beta dx + \frac{1}{\beta} \int f(x)^\beta dx - \frac{1}{\beta-1} \int g(x)f(x)^{\beta-1} dx,$$

597 *where  $\beta \in \mathbb{R} \setminus \{0, 1\}$ .  $D_B^{(\beta)}$  is a member of the Bregman-divergence family [16] with  $\psi(t) = \frac{1}{\beta(\beta-1)}t^\beta$ .*

598 *When  $\beta \rightarrow 1$ ,  $D_B^{(1)}(g(x)||f(x)) \rightarrow \text{KLD}(g(x)||f(x))$ .*

599 The  $\beta$ -divergence has often been referred to as the *density-power divergence* in the statistics literature  
 600 [9] where it is often parameterised with  $\beta_{DPD} = \beta - 1$ .

601 Intuition for how  $\beta$ D-Bayes provides DP estimation is provided in Figure 5 which shows the  
 602 divergence between the posterior before and after adding an observation  $y$  that is  $|y - \mu|$  standard  
 603 deviations away from the posterior mean  $\mu$  when updating using a Gaussian distribution under  
 604 KLD-Bayes and  $\beta$ D-Bayes. The influence of observations under KLD-Bayes is steadily increasing,  
 605 making the posterior sensitive to extreme observations and therefore leaking their information. Under  
 606  $\beta$ D-Bayes, the influence initially increases before being maximised at a point depending on the value  
 607 of  $\beta$ , before decreasing to 0. Therefore, each observation has bounded influence on the posterior,  
 608 allowing for DP estimation.

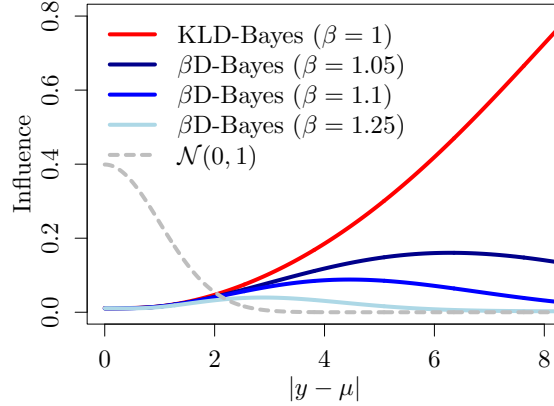

Figure 5: The influence of adding an observation  $y$  with  $|y - \mu|$  on the posterior conditioned on a sample of 1000 points from a  $\mathcal{N}(0, 1)$  when fitting a  $\mathcal{N}(\mu, \sigma^2)$ .

609 **A.1 Bernstein-von Mises theorem for  $\beta$ D-Bayes**

610 The general Bernstein-von Mises theorem for generalised posteriors [Theorem 4; 64] can be applied  
 611 to the  $\beta$ D-Bayes posterior to show that

$$\int \left| \tilde{\pi}^{(\beta)}(\phi) - \mathcal{N}\left(\phi; 0, (H_0^{(\beta)})^{-1}\right) \right| d\phi \xrightarrow[n \rightarrow \infty]{} 0 \quad (5)$$

612 where  $\tilde{\pi}^{(\beta)}$  denotes the density of  $\sqrt{n}(\tilde{\theta} - \hat{\theta}_n^{(\beta)})$  when  $\tilde{\theta} \sim \pi^{(\beta)}(\cdot; D)$ ,  $\mathcal{N}(x; \mu, \sigma^2)$  denotes the  
 613 normal distribution with mean  $\mu$  and variance  $\sigma^2$ , and

$$\hat{\theta}_n^{(\beta)} := \arg \min_{\theta \in \Theta} \sum_{i=1}^n \ell^{(\beta)}(D_i, f(\cdot; \theta)), \quad \theta_0^{(\beta)} := \arg \min_{\theta \in \Theta} \mathbb{E}_g \left[ \ell^{(\beta)}(D, f(\cdot; \theta)) \right]$$

$$H_0^{(\beta)} := \left( \frac{\partial}{\partial \theta_i \partial \theta_j} \mathbb{E}_D \left[ \ell^{(\beta)}(D, f(\cdot; \theta_0^{(\beta)})) \right] \right)_{i,j}.$$

614 That is to show that the  $\beta$ D-Bayes posterior converges to a Gaussian distribution centered around the  
 615  $\beta$ D minimising parameter  $\theta_0^{(\beta)}$  in total variation distance.

## 616 A.2 Proofs

### 617 A.2.1 Proof of Lemma 1

618 **Lemma 1** (Bounded sensitivity of the  $\beta$ D-Bayes loss). *Under Condition 1 the sensitivity of the*  
 619  *$\beta$ D-Bayes-loss for any  $\beta > 1$  is  $|\ell^{(\beta)}(D, f(\cdot; \theta)) - \ell^{(\beta)}(D', f(\cdot; \theta))| \leq \frac{M^{\beta-1}}{\beta-1}$ .*

620 *Proof.* By (4), for  $\beta > 1$

$$\begin{aligned} \left| \ell^{(\beta)}(D, f(\cdot; \theta)) - \ell^{(\beta)}(D', f(\cdot; \theta)) \right| &= \frac{1}{\beta-1} (f(D'; \theta)^{\beta-1} - f(D; \theta)^{\beta-1}) \\ &\leq \max_D \frac{1}{\beta-1} f(D; \theta)^{\beta-1} \\ &\leq \frac{M^{\beta-1}}{\beta-1} \end{aligned}$$

621

□

### 622 A.2.2 Proof of Theorem 1

623 **Theorem 1** (Differential privacy of the  $\beta$ D-Bayes posterior). *Under Condition 1, a draw  $\tilde{\theta}$  from the*  
 624  *$\beta$ D-Bayes posterior  $\pi^{(\beta)}(\theta|D)$  in (3) is  $(\frac{2M^{\beta-1}}{\beta-1}, 0)$ -differentially private.*

625 *Proof.* Define  $D = \{D_1, \dots, D_n\}$ ,  $D' = \{D'_1, \dots, D'_n\}$  and let  $j$  be the index such that  $D_j \neq D'_j$   
 626 with  $D_j = D'_i$  for all  $i \neq j$ . Firstly, the normalising constant of the  $\beta$ D-Bayes posterior combining  
 627 (3) with (4) is

$$P^\ell(D) := \int \pi(\theta) \exp\left(-w \sum_{i=1}^n \ell\{\theta, D_i\}\right) d\theta \quad (6)$$

628 Then,

$$\begin{aligned} \log \frac{\pi^{(\beta)}(\theta|D)}{\pi^{(\beta)}(\theta|D')} &= \sum_{i=1}^n \ell^{(\beta)}(D'_i, f(\cdot; \theta)) - \sum_{i=1}^n \ell^{(\beta)}(D_i, f(\cdot; \theta)) + \log \frac{P^{(\beta)}(D')}{P^{(\beta)}(D)} \\ &= \ell^{(\beta)}(D'_j; f(\cdot; \theta)) - \ell^{(\beta)}(D_j; f(\cdot; \theta)) + \log \frac{P^{(\beta)}(D')}{P^{(\beta)}(D)} \end{aligned}$$

629 where  $P^{(\beta)}(D')$  is the normaliser of the general Bayesian posterior defined in (3).

630 Now, by Condition 1 and Lemma 1,

$$\ell^{(\beta)}(D'_j; f(\cdot; \theta)) - \ell^{(\beta)}(D_j; f(\cdot; \theta)) \leq \frac{M^{\beta-1}}{\beta-1},$$

631 and

$$\begin{aligned} P^{(\beta)}(D') &= \int \exp\left\{-\sum_{i=1}^n \ell^{(\beta)}(D'_i, f(\cdot; \theta))\right\} \pi(\theta) d\theta \\ &= \int \exp\left\{\ell^{(\beta)}(D_j, f(\cdot; \theta)) - \ell^{(\beta)}(D'_j, f(\cdot; \theta)) - \sum_{i=1}^n \ell^{(\beta)}(D_i, f(\cdot; \theta))\right\} \pi(\theta) d\theta \\ &= \exp\left\{\frac{M^{\beta-1}}{\beta-1}\right\} \int \exp\left\{-\sum_{i=1}^n \ell^{(\beta)}(D_i, f(\cdot; \theta))\right\} \pi(\theta) d\theta, \end{aligned}$$

632 which combined provides that

$$\log \frac{\pi(\theta|D)}{\pi(\theta|D')} \leq 2 \frac{M^{\beta-1}}{\beta-1}.$$

633

□

634 **A.2.3 Proof of Theorem 2**

635 **Theorem 2** (Consistency of  $\beta$ D-Bayes sampling). *Under the conditions of Theorem 4 of [64],*

- 636 1. *a posterior sample  $\tilde{\theta} \sim \pi^{(\beta)}(\theta|D)$  is a consistent estimator of  $\theta_0^{(\beta)}$ .*  
 637 2. *if data  $D_1, \dots, D_n \sim g(\cdot)$  were generated such that there exists  $\theta_0$  with  $g(D) = f(D; \theta_0)$ , then*  
 638  *$\tilde{\theta} \sim \pi^{(\beta)}(\theta|D)$  for all  $1 \leq \beta \leq \infty$  is consistent for  $\theta_0$ .*

639 *Proof.* For part 1), define  $B_r(x_0) = \{x \in \mathbb{R}^p : |x - x_0| < r\}$ . Theorem 4 of [64] applied to  
 640  $\beta$ D-Bayes posterior proves that

$$\int_{B_\varepsilon(\theta_0^{(\beta)})} \pi^{(\beta)}(\theta|D) d\theta \xrightarrow[n \rightarrow \infty]{} 1$$

641 for all  $\varepsilon > 0$ . This is enough to show that for  $\tilde{\theta} \sim \pi^{(\beta)}(\theta|D) \rightarrow \theta_0^{(\beta)}$  in probability.

642 For part 2), note that if  $g(D) = f(D; \theta_0)$ , then for all  $1 \leq \beta \leq \infty$

$$\begin{aligned} \theta_0^{(\beta)} &:= \arg \min_{\theta \in \Theta} \mathbb{E}_g \left[ \ell^{(\beta)}(D; f(\cdot; \theta)) \right] \\ &= \arg \min_{\theta \in \Theta} D_B^{(\beta)}(g || f(\cdot; \theta)) \\ &= \theta_0. \end{aligned}$$

643

□

644 **A.2.4 Proof of Proposition 1**

645 **Proposition 1** (Asymptotic efficiency). *Under the conditions of Theorem 4 of [64],  $\tilde{\theta} \sim \pi^{(\beta)}(\theta|x)$*   
 646 *is asymptotically distributed as  $\sqrt{n}(\tilde{\theta} - \theta_0^{(\beta)}) \xrightarrow[\text{weakly}]{\text{weakly}} \mathcal{N}(0, (H_0^{(\beta)})^{-1} K_0^{(\beta)} (H_0^{(\beta)})^{-1} + (H_0^{(\beta)})^{-1})$ ,*  
 647 *where  $K_0^{(\beta)}$  and  $H_0^{(\beta)}$  are defined in Appendix A.1.*

648 *Proof.* Let  $\tilde{\theta} \sim \pi^{(\beta)}(\theta|D)$ . By the Bernstein-von Mises theorem [64] applied to  $\beta$ D-Bayes in (5),

$$\sqrt{n}(\tilde{\theta} - \hat{\theta}_n^{(\beta)}) \rightarrow \mathcal{N}(0, (H_0^{(\beta)})^{-1}).$$

649 By the asymptotic normality of  $\hat{\theta}_n^{(\beta)}$  [10], we have that

$$\sqrt{n}(\hat{\theta}_n^{(\beta)} - \theta_0^{(\beta)}) \rightarrow^D \mathcal{N}(0, (H_0^{(\beta)})^{-1} K_0^{(\beta)} (H_0^{(\beta)})^{-1})$$

650 for  $K_0 := \left( \frac{\partial}{\partial \theta_i} \mathbb{E}_D \left[ \ell^{(\beta)}(D; f(\cdot; \theta_0^{(\beta)})) \right] \frac{\partial}{\partial \theta_j} \mathbb{E}_D \left[ \ell^{(\beta)}(D; f(\cdot; \theta_0^{(\beta)})) \right] \right)_{i,j}$ . The result then comes

651 from the asymptotic independence of  $\tilde{\theta} - \hat{\theta}_n^{(\beta)}$  and  $\hat{\theta}_n^{(\beta)}$  [see e.g. 80] □

652 **A.2.5 Proof of Proposition 2**

653 **Proposition 2** (DP-MCMC methods for the  $\beta$ D-Bayes-Posterior). *Under Condition 1, the penalty*  
 654 *algorithm of [Algorithm 1; 82], DP-HMC of [Algorithm 1; 72] and DP-Fast MH of [Algorithm 2;*  
 655 *84] and under further Condition 2 DP-SGLD of [Algorithm 1; 56] can be used to produce  $(\epsilon, \delta)$ -DP*  
 656 *estimation from the  $\beta$ D-Bayes posterior with  $\delta > 0$  without requiring the clipping of any gradients.*

657 **Condition 2** (Boundedness of the model density/mass function gradient). *The model density or mass*  
 658 *function  $f(\cdot; \theta)$  is such that there exists  $0 < G^{(\beta)} < \infty$  such that  $|\nabla_\theta f(D; \theta) \times f(D; \theta)^{\beta-2}| \leq$*   
 659  *$G^{(\beta)}, \forall \theta \in \Theta$ .*

660 *Proof.* Algorithm 1 of [82], Algorithm 1 of [72] and Algorithm 2 of [84] requires a posterior whose  
 661 log-likelihood has bounded sensitivity. For  $\beta$ D-Bayes posterior, this requires  $\beta$ D-Bayes-loss has  
 662 bounded sensitivity which is provided by Condition 1 and Lemma 1.

663 Algorithm 1 of [56] requires a posterior whose log-likelihood has bounded gradient. For  $\beta$ D-Bayes  
 664 posterior, this requires  $\beta$ D-Bayes-loss to have bounded gradient:

$$\begin{aligned} |\nabla_{\theta} \ell^{(\beta)}(D; \theta)| &= \nabla_{\theta} f(D; \theta) \times f(D; \theta)^{\beta-2} - \int \nabla_{\theta} f(D; \theta) \times f(D; \theta)^{\beta-1} dD \\ &= \nabla_{\theta} f(D; \theta) \times f(D; \theta)^{\beta-2} - \int \nabla_{\theta} f(D; \theta) \times f(D; \theta)^{\beta-2} \times f(D; \theta) dD \\ &\leq \max\{G^{(\beta)}, G^{(\beta)} M\}, \end{aligned}$$

665 assuming we can interchange integration and differentiation and as  $|\nabla_{\theta} f(D; \theta) \times f(D; \theta)^{\beta-2}| \leq$   
 666  $G^{(\beta)}$  by Condition 2 not requiring the clipping of any gradients.  $\square$

### 667 A.3 Related work

668 Here, we would like to extend our discussion of two important areas within the related work.

#### 669 A.3.1 Differentially private logistic regression

670 Chaudhuri et al. [19] propose a regularised DP logistic regression, solving (1). (1) adds the regulariser  
 671 to the average loss and as a result, the impact of the regulariser does not diminish as  $n \rightarrow \infty$ . Even  
 672 though the scale of the Laplace noise decreases as  $n$  grows, Chaudhuri et al. [19] consistently estimate  
 673 a parameter that is not the data generating parameter. Alternatively, one could choose a regulariser  
 674  $\lambda' := \frac{\lambda}{n}$  whose influence decreases as  $n$  grows. This would allow for unbiased inference as  $n \rightarrow \infty$   
 675 (assuming a Bayesian model with corresponding prior distribution), but the  $n$  cancels in the scale of  
 676 the Laplace noise and therefore the perturbation scale does not decrease in  $n$ , and the estimator is  
 677 inconsistent. Choosing instead  $\lambda' := \frac{\lambda}{n^r}$  with  $0 < r < 1$ , would help in constructing unbiased and  
 678 consistent estimators. In our experiments, we did not find this choice to help.

#### 679 A.3.2 Differentially private Monte Carlo methods

680 Wang et al. [80] propose using Stochastic Gradient Langevin Dynamics [SGLD; 81] with a modified  
 681 burn-in period and bounded step-size to provide DP sampling when the log-likelihood has bounded  
 682 gradient. Li et al. [56] improve upon [80], taking advantage of the moments accountant [1] to allow  
 683 for a larger step-size and faster mixing for non-convex target posteriors. Foulds et al. [28] extend  
 684 their privatisation of sufficient statistics to a Gibbs sampling setting where the conditional posterior  
 685 distribution for a Gibbs update is from the exponential family. Yıldırım and Ermiş [82] use the  
 686 penalty algorithm which adds noise to the log of the Metropolis-Hastings acceptance probability.  
 687 Heikkilä et al. [38] use Barker’s acceptance test [8, 75] and provide RDP guarantees. Räisä et al. [72]  
 688 derive DP-HMC also using the penalty algorithm. Zhang and Zhang [84] propose a random batch  
 689 size implementation of Metropolis-Hasting for a general proposal distribution that takes advantage of  
 690 the inherent randomness of Metropolis-Hasting and is asymptotically exact. Lastly, Awan and Rao  
 691 [7] consider DP rejection sampling.

### 692 A.4 Attack optimality

693 **Remark 1.** Let  $p(\tilde{\theta}|D)$  be the density of the privacy mechanism—i.e the Laplace density for [19] or  
 694 the posterior (i.e. Equations 2,3) for OPS. An attacker estimating  $\mathcal{M}(\tilde{\theta}, D, D') = \frac{p(\tilde{\theta}|D')}{(p(\tilde{\theta}|D) + p(\tilde{\theta}|D'))}$   
 695 is Bayes optimal. For OPS,  $\mathcal{M}(\tilde{\theta}, D, D') = \exp\{\ell(D'_i; f(\cdot; \tilde{\theta})) - \ell(D_i; \tilde{\theta})\} \int \exp\{\ell(D_i; f(\cdot; \theta)) -$   
 696  $\ell(D'_i; f(\cdot; \theta))\} \pi(\theta|D) d\theta$  where  $D, D'$  s.t.  $D \setminus D' = \{D_i\}$  and  $D' \setminus D = \{D'_i\}$  (see Appendix A.4).

697 The privacy attacks outlined in Section 4 require the calculation of

$$\begin{aligned} \mathcal{M}(\tilde{\theta}, D, D') &:= p(m = 1; \tilde{\theta}, D, D') = p(\tilde{\theta}|D') / (p(\tilde{\theta}|D) + p(\tilde{\theta}|D')) \\ &= 1 / (p(\tilde{\theta}|D) / p(\tilde{\theta}|D') + 1) \end{aligned}$$

698 by Bayes Theorem. For [19], it is

$$p(\tilde{\theta}|D) = \mathcal{L}\left(\hat{\theta}(D), \frac{2}{n\lambda\epsilon}\right),$$

699 where  $\hat{\theta}(D)$  was defined in (1).

700 For the OPS methods, Minami et al. [65] and  $\beta$ D-Bayes,  $p(\tilde{\theta}|D)$  is the posterior

$$p(\tilde{\theta}|D) = \pi^{(\ell)}(\tilde{\theta}|D) \propto \pi(\theta) \exp\left\{-\sum_{i=1}^n \ell(D_i; \theta)\right\}$$

701 where for [65]  $\ell(D_i; f(\cdot; \theta)) = -w \log f(D_i; \theta)$ , and for  $\beta$ D-Bayes  $\ell(D_i; f(\cdot; \theta)) =$   
 702  $\ell^{(\beta)}(D_i; f(\cdot; \theta))$  given in (4). Without loss of generality, index observations within  $D$  and  $D'$   
 703 such that  $D \setminus D' = \{D_l\}$  and  $D' \setminus D = \{D'_l\}$ . Then,

$$\begin{aligned} \frac{\tilde{\pi}(\tilde{\theta}|D)}{\tilde{\pi}(\tilde{\theta}|D')} &= \frac{\pi(\tilde{\theta}) \exp\{-\sum_{i=1}^n \ell(D_i; f(\cdot; \tilde{\theta}))\}}{\int \pi(\theta) \exp\{-\sum_{i=1}^n \ell(D_i; f(\cdot; \theta))\} d\theta} \bigg/ \frac{\pi(\tilde{\theta}) \exp\{-\sum_{i=1}^n \ell(D'_i; f(\cdot; \tilde{\theta}))\}}{\int \pi(\theta) \exp\{-\sum_{i=1}^n \ell(D'_i; f(\cdot; \theta))\} d\theta} \\ &= \exp\{\ell(D'_l; f(\cdot; \tilde{\theta})) - \ell(D_l; f(\cdot; \tilde{\theta}))\} \int \frac{\pi(\theta) \exp\{-\sum_{i=1}^n \ell(D'_i; f(\cdot; \theta))\}}{\int \pi(\theta) \exp\{-\sum_{i=1}^n \ell(D_i; f(\cdot; \theta))\} d\theta} d\theta \\ &= \exp\{\ell(D'_l; f(\cdot; \tilde{\theta})) - \ell(D_l; f(\cdot; \tilde{\theta}))\} \\ &\quad \int \exp\{\ell(D_l; f(\cdot; \theta)) - \ell(D'_l; f(\cdot; \theta))\} \frac{\pi(\theta) \exp\{-\sum_{i=1}^n \ell(D_i; f(\cdot; \theta))\}}{\int \pi(\theta) \exp\{-\sum_{i=1}^n \ell(D_i; f(\cdot; \theta))\} d\theta} d\theta \\ &= \exp\{\ell(D'_l; f(\cdot; \tilde{\theta})) - \ell(D_l; f(\cdot; \tilde{\theta}))\} \int \exp\{\ell(D_l; f(\cdot; \theta)) - \ell(D'_l; f(\cdot; \theta))\} \pi(\theta|D) d\theta \\ &\approx \exp\{\ell(D'_l; f(\cdot; \tilde{\theta})) - \ell(D_l; f(\cdot; \tilde{\theta}))\} \frac{1}{N} \sum_j^N \exp\{\ell(D_l; f(\cdot; \theta_j)) - \ell(D'_l; f(\cdot; \theta_j))\}, \end{aligned}$$

704 where  $\{\theta_j\}_{j=1}^N \sim \pi(\theta|D)$ . The adversary only needs to sample from the posterior based on dataset  
 705  $D$  to be able to estimate  $\mathcal{M}(\tilde{\theta}, D, D')$  for all  $D'$  differing from  $D$  in only one index  $l$ .

## 706 Appendix B Additional experimental details and results

707 **Additional experimental details** Unless otherwise specified, we choose  $d = 2$  in the simulated  
 708 experiments. The MCMC methods are run for 1000 warm-up steps, and 100 iterations. DPSGD is  
 709 run for  $15 + \lfloor \epsilon \rfloor$  epochs, with clipping norm 1, batch size 100, and learning rate of  $10^{-2}$ . All other  
 710 implementation details can be found on [https://anonymous.4open.science/r/beta-bayes-](https://anonymous.4open.science/r/beta-bayes-ops-6626)  
 711 [ops-6626](https://anonymous.4open.science/r/beta-bayes-ops-6626).

712 **Neural network classification** Similarly to neural network regression, we can use  $\beta$ D-Bayes for  
 713 neural network classification. As we see in Figure 6,  $\beta$ D-Bayes regularly outperforms DPSGD for  
 714  $\epsilon > 0.2$  on simulated and real data, except on abalone.

715 **Sensitivity in number of features** Please refer to Figure 7 for the sensitivity of the private methods  
 716 w.r.t. the number of features in the data set. We see that the RMSE of the data generating parameter  $\theta$   
 717 (divided by the number of dimensions of  $\theta$ ) increases. The reason for this is two-fold: 1) The methods  
 718 of [19] and [65] provide their privacy guarantees w.r.t. the number of features. While more noise  
 719 has to be added for [19], the influence of the prior increases for [65] when the number of features  
 720 increases for a fixed privacy budget. 2) A single sample from a posterior is of higher variance the  
 721 higher-dimensional the posterior is, negatively influencing OPS methods such as [65] and  $\beta$ D-Bayes.  
 722

723 **Membership inference attacks** For  $\epsilon \in \{0.2, 1, 2, 7, 10, 20\}$ , we run 10,000 rounds of the attack  
 724 presented in Section 4. In Figure 8, we use the approach presented by [44] to estimate a lower bound  
 725 on  $\epsilon$  given the false positive and negative rates of the attacks. Note that these lower bounds are  
 726 unrealistic for  $\epsilon < 1$ . We see that, for any RMSE value,  $\beta$ D-Bayes achieves a lower practical bound  
 727 on  $\epsilon$  than [19], which gives exact privacy guarantees.

728 **Compute** While the final experimental results can be run within approximately two hours on a  
 729 single Intel(R) Xeon(R) Gold 5118 CPU @ 2.30GHz core, the complete compute needed for the final  
 730 results, debugging runs, and sweeps amounts to around 11 days.

731 **Licenses** The UCI data sets are licensed under Creative Commons Attribution 4.0 International  
 732 license (CC BY 4.0).

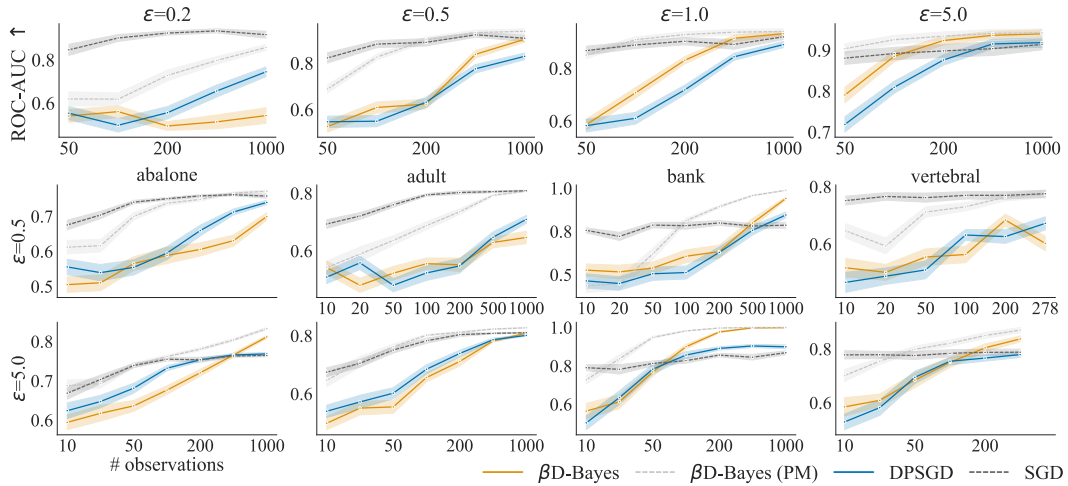

Figure 6: Test set predictive ROC-AUC of DP estimation for neural network classification as the number of observations  $n$  increases on simulated and UCI data.

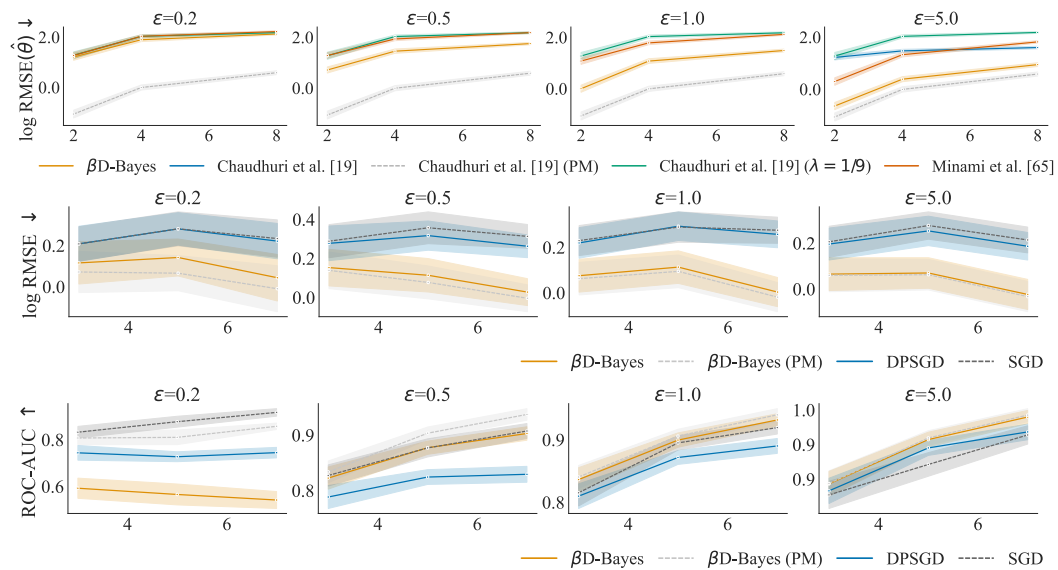

Figure 7: Parameter log RMSE of DP logistic regression (**first row**), test set predictive log RMSE of DP neural network regression (**second row**), and test set ROC-AUC of DP neural network classification (**third row**) as the number of features  $d$  increases on simulated data with  $n = 1000$ .

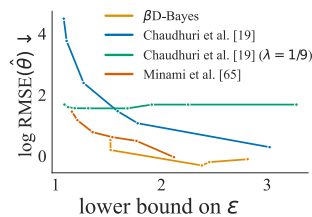

Figure 8: Lower bound on  $\epsilon$  against log RMSE. Points correspond to values of  $\epsilon$ .

## References

- 733
- 734 [1] Martin Abadi, Andy Chu, Ian Goodfellow, H Brendan McMahan, Ilya Mironov, Kunal Talwar,  
735 and Li Zhang. Deep learning with differential privacy. In *Proceedings of the 2016 ACM SIGSAC*  
736 *conference on computer and communications security*, pages 308–318, 2016.
- 737 [2] Haleh Akrami, Wenhui Cui, Anand A Joshi, and Richard M. Leahy. Learning from imperfect  
738 training data using a robust loss function: application to brain image segmentation, 2022.
- 739 [3] Haleh Akrami, Anand A Joshi, Jian Li, Sergül Aydıre, and Richard M Leahy. A robust  
740 variational autoencoder using beta divergence. *Knowledge-Based Systems*, 238:107886, 2022.
- 741 [4] Matias Altamirano, François-Xavier Briol, and Jeremias Knoblauch. Robust and scalable  
742 Bayesian online changepoint detection. *arXiv preprint arXiv:2302.04759*, 2023.
- 743 [5] Marco Avella-Medina. The role of robust statistics in private data analysis. *Chance*, 33(4):  
744 37–42, 2020.
- 745 [6] Marco Avella-Medina. Privacy-preserving parametric inference: a case for robust statistics.  
746 *Journal of the American Statistical Association*, 116(534):969–983, 2021.
- 747 [7] Jordan Awan and Vinayak Rao. Privacy-aware rejection sampling. *Journal of Machine Learning*  
748 *Research*, 24(74):1–32, 2023.
- 749 [8] Anthony Alfred Barker. Monte Carlo calculations of the radial distribution functions for a  
750 proton? electron plasma. *Australian Journal of Physics*, 18(2):119–134, 1965.
- 751 [9] Ayanendranath Basu, Ian R Harris, Nils L Hjort, and MC Jones. Robust and efficient estimation  
752 by minimising a density power divergence. *Biometrika*, 85(3):549–559, 1998.
- 753 [10] Ayanendranath Basu, Hiroyuki Shioya, and Chanseok Park. *Statistical inference: the minimum*  
754 *distance approach*. CRC Press, 2011.
- 755 [11] Robert H Berk et al. Limiting behavior of posterior distributions when the model is incorrect.  
756 *The Annals of Mathematical Statistics*, 37(1):51–58, 1966.
- 757 [12] Garrett Bernstein and Daniel R Sheldon. Differentially private Bayesian inference for exponen-  
758 tial families. *Advances in Neural Information Processing Systems*, 31, 2018.
- 759 [13] Garrett Bernstein and Daniel R Sheldon. Differentially private Bayesian linear regression.  
760 *Advances in Neural Information Processing Systems*, 32, 2019.
- 761 [14] Michael Betancourt. A conceptual introduction to hamiltonian Monte Carlo. *arXiv preprint*  
762 *arXiv:1701.02434*, 2017.
- 763 [15] PG Bissiri, CC Holmes, and Stephen G Walker. A general framework for updating belief  
764 distributions. *Journal of the Royal Statistical Society: Series B (Statistical Methodology)*, 2016.
- 765 [16] Lev M Bregman. The relaxation method of finding the common point of convex sets and  
766 its application to the solution of problems in convex programming. *USSR computational*  
767 *mathematics and mathematical physics*, 7(3):200–217, 1967.
- 768 [17] Bob Carpenter, Andrew Gelman, Matt Hoffman, Daniel Lee, Ben Goodrich, Michael Betan-  
769 court, Michael A Brubaker, Jiqiang Guo, Peter Li, and Allen Riddell. Stan: A probabilistic  
770 programming language. *Journal of Statistical Software*, 20, 2016.
- 771 [18] Kamalika Chaudhuri and Daniel Hsu. Convergence rates for differentially private statistical es-  
772 timation. In *Proceedings of the... International Conference on Machine Learning. International*  
773 *Conference on Machine Learning*, volume 2012, page 1327. NIH Public Access, 2012.
- 774 [19] Kamalika Chaudhuri, Claire Monteleoni, and Anand D Sarwate. Differentially private empirical  
775 risk minimization. *Journal of Machine Learning Research*, 12(3), 2011.
- 776 [20] Wenhui Cui, Haleh Akrami, Anand A Joshi, and Richard M Leahy. Semi-supervised learning  
777 using robust loss. *arXiv preprint arXiv:2203.01524*, 2022.
- 778 [21] Soham De, Leonard Berrada, Jamie Hayes, Samuel L Smith, and Borja Balle. Unlock-  
779 ing high-accuracy differentially private image classification through scale. *arXiv preprint*  
780 *arXiv:2204.13650*, 2022.



- 781 [22] Christos Dimitrakakis, Blaine Nelson, Aikaterini Mitrokotsa, and Benjamin IP Rubinstein.  
782 Robust and private Bayesian inference. In *Algorithmic Learning Theory: 25th International*  
783 *Conference, ALT 2014, Bled, Slovenia, October 8-10, 2014. Proceedings 25*, pages 291–305.  
784 Springer, 2014.
- 785 [23] Christos Dimitrakakis, Blaine Nelson, Zuhe Zhang, Aikaterini Mitrokotsa, and Benjamin IP  
786 Rubinstein. Differential privacy for Bayesian inference through posterior sampling. *The Journal*  
787 *of Machine Learning Research*, 18(1):343–381, 2017.
- 788 [24] Dheeru Dua and Casey Graff. UCI machine learning repository, 2017. URL [http://archive.](http://archive.ics.uci.edu/ml)  
789 [ics.uci.edu/ml](http://archive.ics.uci.edu/ml).
- 790 [25] Simon Duane, Anthony D Kennedy, Brian J Pendleton, and Duncan Roweth. Hybrid Monte  
791 Carlo. *Physics Letters B*, 195(2):216–222, 1987.
- 792 [26] Cynthia Dwork and Jing Lei. Differential privacy and robust statistics. In *Proceedings of the*  
793 *forty-first annual ACM symposium on Theory of computing*, pages 371–380, 2009.
- 794 [27] Cynthia Dwork, Frank McSherry, Kobbi Nissim, and Adam Smith. Calibrating noise to  
795 sensitivity in private data analysis. In *Theory of cryptography conference*, pages 265–284.  
796 Springer, 2006.
- 797 [28] James Foulds, Joseph Geumlek, Max Welling, and Kamalika Chaudhuri. On the theory and  
798 practice of privacy-preserving Bayesian data analysis. *arXiv preprint arXiv:1603.07294*, 2016.
- 799 [29] Hironori Fujisawa and Shinto Eguchi. Robust parameter estimation with a small bias against  
800 heavy contamination. *Journal of Multivariate Analysis*, 99(9):2053–2081, 2008.
- 801 [30] Arun Ganesh and Kunal Talwar. Faster differentially private samplers via rényi divergence  
802 analysis of discretized Langevin MCMC. *Advances in Neural Information Processing Systems*,  
803 33:7222–7233, 2020.
- 804 [31] Joseph Geumlek, Shuang Song, and Kamalika Chaudhuri. Rényi differential privacy mecha-  
805 nisms for posterior sampling. *Advances in Neural Information Processing Systems*, 30, 2017.
- 806 [32] Sahra Ghalebikesabi, Harry Wilde, Jack Jewson, Arnaud Doucet, Sebastian Vollmer, and Chris  
807 Holmes. Mitigating statistical bias within differentially private synthetic data. In *Uncertainty in*  
808 *Artificial Intelligence*, pages 696–705. PMLR, 2022.
- 809 [33] Abhik Ghosh and Ayanendranath Basu. Robust Bayes estimation using the density power  
810 divergence. *Annals of the Institute of Statistical Mathematics*, 68(2):413–437, 2016.
- 811 [34] Paolo Girardi, Luca Greco, Valentina Mameli, Monica Musio, Walter Racugno, Erlis Ruli,  
812 and Laura Ventura. Robust inference for non-linear regression models from the tsallis score:  
813 Application to coronavirus disease 2019 contagion in italy. *Stat*, 9(1):e309, 2020.
- 814 [35] Federica Giummolè, Valentina Mameli, Erlis Ruli, and Laura Ventura. Objective Bayesian  
815 inference with proper scoring rules. *Test*, 28(3):728–755, 2019.
- 816 [36] Frank R Hampel, Elvezio M Ronchetti, Peter J Rousseeuw, and Werner A Stahel. *Robust*  
817 *statistics: the approach based on influence functions*, volume 114. John Wiley & Sons, 2011.
- 818 [37] S Harini, K Nivedha, Selva Keerthana BG, R Gokul, BS Jayasree, et al. Data anomaly detection  
819 in wireless sensor networks using  $\beta$ -variational autoencoder. In *2023 International Conference*  
820 *on Intelligent Systems for Communication, IoT and Security (ICISCoIS)*, pages 631–636. IEEE,  
821 2023.
- 822 [38] Mikko Heikkilä, Joonas Jälkö, Onur Dikmen, and Antti Honkela. Differentially private Markov  
823 chain Monte Carlo. *Advances in Neural Information Processing Systems*, 32, 2019.
- 824 [39] Matthew D Hoffman and Andrew Gelman. The No-U-Turn sampler: adaptively setting path  
825 lengths in Hamiltonian Monte Carlo. *Journal of Machine Learning Research*, 15(1):1593–1623,  
826 2014.
- 827 [40] Naoise Holohan, Stefano Braghin, Pól Mac Aonghusa, and Killian Levacher. Diffprivlib: the  
828 ibm differential privacy library. *arXiv preprint arXiv:1907.02444*, 2019.



- 829 [41] Antti Honkela, Mrinal Das, Arttu Nieminen, Onur Dikmen, and Samuel Kaski. Efficient  
830 differentially private learning improves drug sensitivity prediction. *Biology direct*, 13:1–12,  
831 2018.
- 832 [42] Peter J Huber and EM Ronchetti. Robust statistics, series in probability and mathematical  
833 statistics, 1981.
- 834 [43] Aapo Hyvärinen. Estimation of non-normalized statistical models by score matching. *Journal*  
835 *of Machine Learning Research*, 6(Apr):695–709, 2005.
- 836 [44] Matthew Jagielski, Jonathan Ullman, and Alina Oprea. Auditing differentially private machine  
837 learning: How private is private sgd? *Advances in Neural Information Processing Systems*, 33:  
838 22205–22216, 2020.
- 839 [45] Joonas Jälkö, Onur Dikmen, and Antti Honkela. Differentially private variational inference for  
840 non-conjugate models. *arXiv preprint arXiv:1610.08749*, 2016.
- 841 [46] Jack Jewson, Jim Smith, and Chris Holmes. Principles of Bayesian inference using general  
842 divergence criteria. *Entropy*, 20(6):442, 2018.
- 843 [47] Jack Jewson, Jim Q Smith, and Chris Holmes. On the stability of general Bayesian inference.  
844 *arXiv preprint arXiv:2301.13701*, 2023.
- 845 [48] Jeremias Knoblauch, Jack Jewson, and Theodoros Damoulas. Doubly robust Bayesian inference  
846 for non-stationary streaming data using  $\beta$ -divergences. In *Advances in Neural Information*  
847 *Processing Systems (NeurIPS)*, pages 64–75, 2018.
- 848 [49] Jeremias Knoblauch, Jack Jewson, and Theodoros Damoulas. An optimization-centric view on  
849 Bayes’ rule: Reviewing and generalizing variational inference. *Journal of Machine Learning*  
850 *Research*, 23(132):1–109, 2022.
- 851 [50] Hyeyoung Ko, Suyeon Lee, Yoonseo Park, and Anna Choi. A survey of recommendation  
852 systems: recommendation models, techniques, and application fields. *Electronics*, 11(1):141,  
853 2022.
- 854 [51] Michael R Kosorok. *Introduction to empirical processes and semiparametric inference*. Springer,  
855 2008.
- 856 [52] Tejas Kulkarni, Joonas Jälkö, Antti Koskela, Samuel Kaski, and Antti Honkela. Differentially  
857 private Bayesian inference for generalized linear models. In *International Conference on*  
858 *Machine Learning*, pages 5838–5849. PMLR, 2021.
- 859 [53] Solomon Kullback and Richard A Leibler. On information and sufficiency. *The annals of*  
860 *mathematical statistics*, 22(1):79–86, 1951.
- 861 [54] Anthony Lee, Arnaud Doucet, and Krzysztof Łatuszyński. Perfect simulation using atomic  
862 regeneration with application to sequential Monte Carlo. *arXiv preprint arXiv:1407.5770*, 2014.
- 863 [55] Jing Lei. Differentially private m-estimators. *Advances in Neural Information Processing*  
864 *Systems*, 24, 2011.
- 865 [56] Bai Li, Changyou Chen, Hao Liu, and Lawrence Carin. On connecting stochastic gradient  
866 MCMC and differential privacy. In *The 22nd International Conference on Artificial Intelligence*  
867 *and Statistics*, pages 557–566. PMLR, 2019.
- 868 [57] Mengchu Li, Thomas B Berrett, and Yi Yu. On robustness and local differential privacy. *arXiv*  
869 *preprint arXiv:2201.00751*, 2022.
- 870 [58] Samuel Livingstone, Michael Betancourt, Simon Byrne, and Mark Girolami. On the geometric  
871 ergodicity of hamiltonian Monte Carlo. 2019.
- 872 [59] Lauri Lode et al. Sub-sampled and differentially private hamiltonian Monte Carlo. 2019.
- 873 [60] Takuo Matsubara, Jeremias Knoblauch, François-Xavier Briol, Chris Oates, et al. Robust  
874 generalised Bayesian inference for intractable likelihoods. *arXiv preprint arXiv:2104.07359*,  
875 2021.

- 876 [61] H Brendan McMahan, Galen Andrew, Ulfar Erlingsson, Steve Chien, Ilya Mironov, Nicolas  
877 Papernot, and Peter Kairouz. A general approach to adding differential privacy to iterative  
878 training procedures. *arXiv preprint arXiv:1812.06210*, 2018.
- 879 [62] Frank McSherry and Kunal Talwar. Mechanism design via differential privacy. In *48th Annual*  
880 *IEEE Symposium on Foundations of Computer Science (FOCS'07)*, pages 94–103. IEEE, 2007.
- 881 [63] Minami Mihoko and Shinto Eguchi. Robust blind source separation by beta divergence. *Neural*  
882 *computation*, 14(8):1859–1886, 2002.
- 883 [64] Jeffrey W Miller. Asymptotic normality, concentration, and coverage of generalized posteriors.  
884 *The Journal of Machine Learning Research*, 22(1):7598–7650, 2021.
- 885 [65] Kentaro Minami, Hltomi Arai, Issei Sato, and Hiroshi Nakagawa. Differential privacy without  
886 sensitivity. *Advances in Neural Information Processing Systems*, 29, 2016.
- 887 [66] Darakhshan J Mir. *Differential privacy: an exploration of the privacy-utility landscape*. Rutgers  
888 The State University of New Jersey, School of Graduate Studies, 2013.
- 889 [67] Ilya Mironov. Rényi differential privacy. In *2017 IEEE 30th computer security foundations*  
890 *symposium (CSF)*, pages 263–275. IEEE, 2017.
- 891 [68] Milad Nasr, Shuang Songi, Abhradeep Thakurta, Nicolas Papernot, and Nicholas Carlin. Ad-  
892 versary instantiation: Lower bounds for differentially private machine learning. In *2021 IEEE*  
893 *Symposium on security and privacy (SP)*, pages 866–882. IEEE, 2021.
- 894 [69] Radford M Neal. *Bayesian learning for neural networks*, volume 118. Springer Science &  
895 Business Media, 2012.
- 896 [70] Mijung Park, James Foulds, Kamalika Chaudhuri, and Max Welling. VariationalBayes in private  
897 settings (vips). *Journal of Artificial Intelligence Research*, 68:109–157, 2020.
- 898 [71] Melanie F Pradier, Niranjani Prasad, Paidamoyo Chapfuwa, Sahra Ghalebikesabi, Max Ilse,  
899 Steven Woodhouse, Rebecca Elyanow, Javier Zazo, Javier Gonzalez, Julia Greissl, et al. Airiva:  
900 A deep generative model of adaptive immune repertoires. *arXiv preprint arXiv:2304.13737*,  
901 2023.
- 902 [72] Ossi Räisä, Antti Koskela, and Antti Honkela. Differentially private hamiltonian Monte Carlo.  
903 *arXiv preprint arXiv:2106.09376*, 2021.
- 904 [73] Alexandre Sablayrolles, Matthijs Douze, Cordelia Schmid, Yann Ollivier, and Hervé Jégou.  
905 White-box vs black-box: Bayes optimal strategies for membership inference. In *International*  
906 *Conference on Machine Learning*, pages 5558–5567. PMLR, 2019.
- 907 [74] Jeremy Seeman, Matthew Reimherr, and Aleksandra Slavković. Exact privacy guarantees for  
908 Markov chain implementations of the exponential mechanism with artificial atoms. *Advances*  
909 *in Neural Information Processing Systems*, 34:13125–13136, 2021.
- 910 [75] Daniel Seita, Xinlei Pan, Haoyu Chen, and John Canny. An efficient minibatch acceptance test  
911 for Metropolis-Hastings. In *Proceedings of the 27th International Joint Conference on Artificial*  
912 *Intelligence*, pages 5359–5363, 2018.
- 913 [76] Adam Smith. Privacy-preserving statistical estimation with optimal convergence rates. In  
914 *Proceedings of the forty-third annual ACM symposium on Theory of computing*, pages 813–822,  
915 2011.
- 916 [77] Theresa Stadler, Bristena Oprisanu, and Carmela Troncoso. Synthetic data—anonymisation  
917 groundhog day. In *31st USENIX Security Symposium (USENIX Security 22)*, pages 1451–1468,  
918 2022.
- 919 [78] Shonosuke Sugawawa. Robust empirical Bayes small area estimation with density power  
920 divergence. *Biometrika*, 107(2):467–480, 2020.
- 921 [79] Stephen G Walker. Bayesian inference with misspecified models. *Journal of Statistical Planning*  
922 *and Inference*, 143(10):1621–1633, 2013.

- 923 [80] Yu-Xiang Wang, Stephen Fienberg, and Alex Smola. Privacy for free: Posterior sampling and  
924 stochastic gradient Monte Carlo. In *International Conference on Machine Learning*, pages  
925 2493–2502. PMLR, 2015.
- 926 [81] Max Welling and Yee W Teh. Bayesian learning via stochastic gradient Langevin dynamics.  
927 In *Proceedings of the 28th international conference on machine learning (ICML-11)*, pages  
928 681–688, 2011.
- 929 [82] Sinan Yıldırım and Beyza Ermiş. Exact MCMC with differentially private moves: revisiting the  
930 penalty algorithm in a data privacy framework. *Statistics and Computing*, 29:947–963, 2019.
- 931 [83] Qiyiwen Zhang, Zhiqi Bu, Kan Chen, and Qi Long. Differentially private Bayesian neural  
932 networks on accuracy, privacy and reliability. In *Machine Learning and Knowledge Discovery  
933 in Databases: European Conference, ECML PKDD 2022, Grenoble, France, September 19–23,  
934 2022, Proceedings, Part IV*, pages 604–619. Springer, 2023.
- 935 [84] Wanrong Zhang and Ruqi Zhang. DP-Fast MH: Private, fast, and accurate Metropolis-Hastings  
936 for large-scale Bayesian inference. *arXiv preprint arXiv:2303.06171*, 2023.
- 937 [85] Zuhe Zhang, Benjamin Rubinstein, and Christos Dimitrakakis. On the differential privacy of  
938 Bayesian inference. In *Proceedings of the AAAI Conference on Artificial Intelligence*, volume 30,  
939 2016.
- 940 [86] Shijie Zheng. *The differential privacy of Bayesian inference*. PhD thesis, Harvard University,  
941 2015.
